# Supplementary material for: Polyunsaturated fatty acids and p38-MAPK link metabolic reprogramming to cytoprotective gene expression during dietary restriction
Source: PubMed Central journal article supplement (PMC7519657; doi:10.1038/s41467-020-18690-4), 2020-09-25
Supplement: 41467_2020_18690_MOESM1_ESM.pdf [file 41467_2020_18690_MOESM1_ESM.pdf]

**Supplementary information file**

**Polyunsaturated fatty acids and p38-MAPK link metabolic reprogramming to cytoprotective gene expression during Dietary Restriction**

Chamoli M., Goyala A., Tabrez SS. et al, 2020

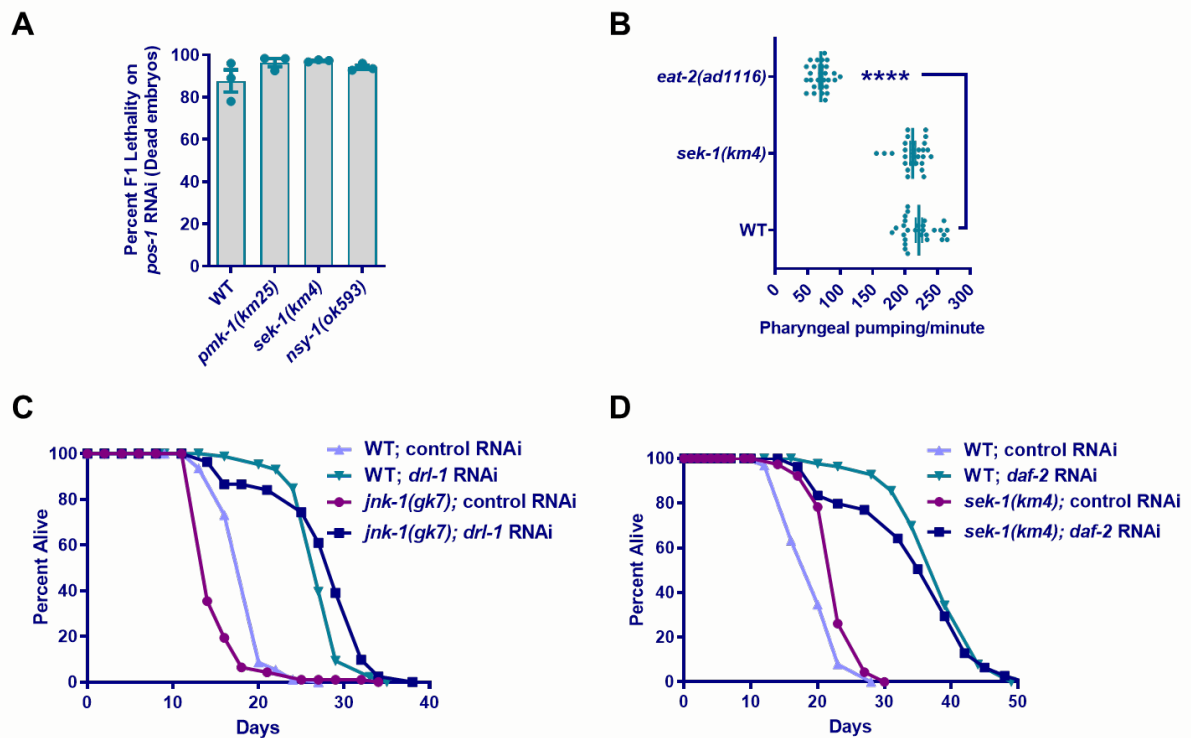

**Supplementary Figure 1.** (A) The *nsy-1(ok593)*, *sek-1(km4)* and *pmk-1(km25)* mutants are not RNAi defective, similar to wild-type (WT). The worms were grown on *pos-1* RNAi and number of L1 or dead embryos counted. Percent dead embryos plotted on x-axis.  $n=3$  independent experiments. Data presented as mean values  $\pm$  SEM. (B) WT and *sek-1(km4)* have similar pharyngeal pumping rates at L4 stage. The *eat-2(ad1116)* that has slow pumping rate was used as a control.  $n=28$  examined in 2 independent experiments. Unpaired two-tailed *t*-test with Welch's correction, \*\*\*\* $P < 0.0001$ . Data represented as mean values  $\pm$  SEM. (C) The knockdown of *drl-1* increases life span in both WT as well as *jnk-1(gk7)*. (D) Knocking down *daf-2* using RNAi results in life span extension in both WT as well as in *sek-1(km4)*. Life span and summary data is provided in Supplementary Table 1. Experiments performed at 20 °C. Source data are provided as a Source Data file.

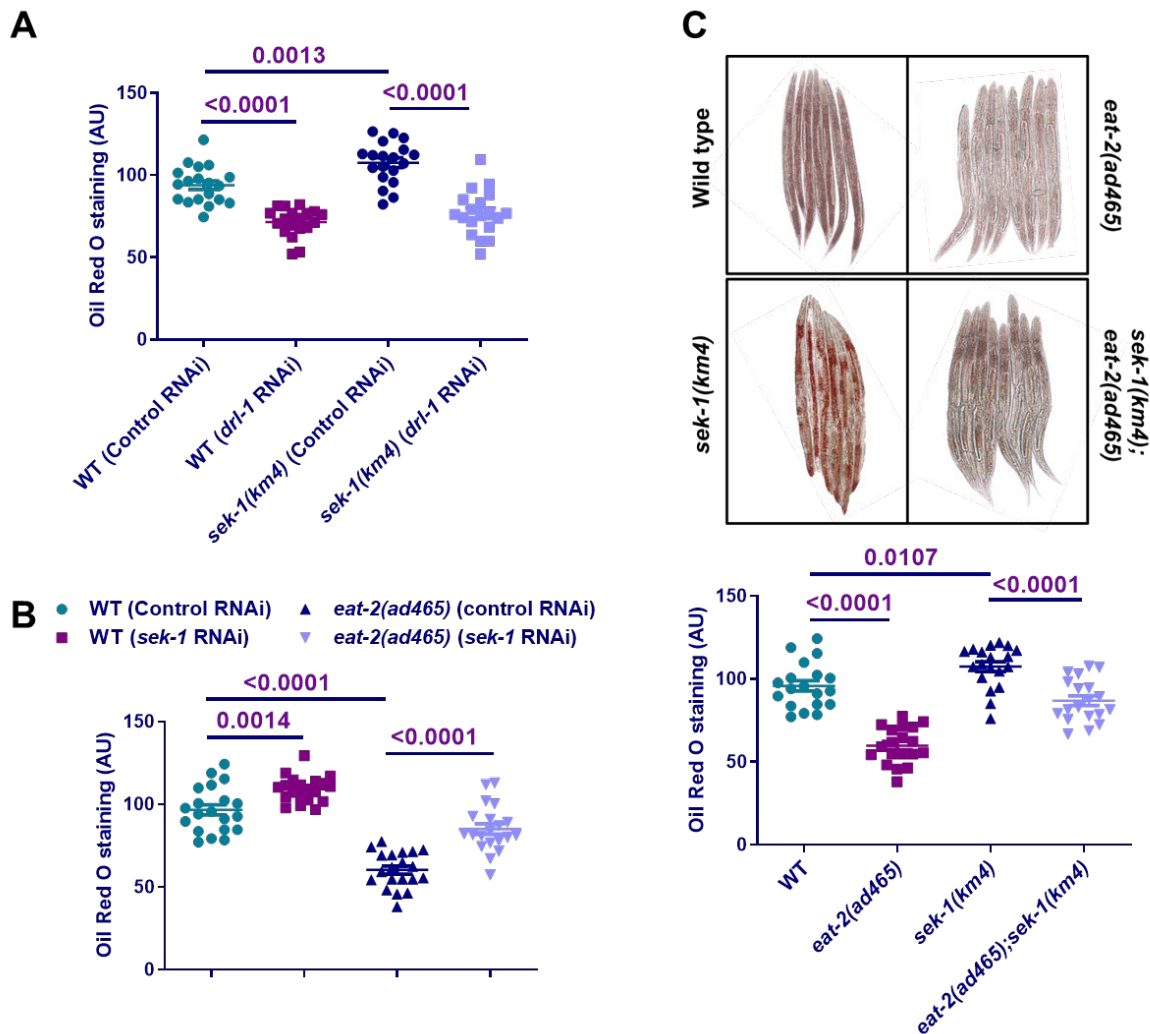

**Supplementary Figure 2. (A)** Quantification of data shown in Figure 3A. n=19. One of three biologically independent experiments is shown. **(B)** Quantification of data shown in Figure 3B. n=20. One of three biologically independent experiments is shown. **(C)** Lower fat storage was observed in *eat-2(ad465)* and *eat-2(ad465);sek-1(km4)* as compared to WT and *sek-1(km4)*, respectively. Quantification of data is shown below. n=19. One of three biologically independent experiments is shown.

Unpaired two-tailed *t*-test with Welch correction used in all cases. Data are presented as mean values  $\pm$  SEM. Experiments performed at 20 °C. Source data are provided as a Source Data file.

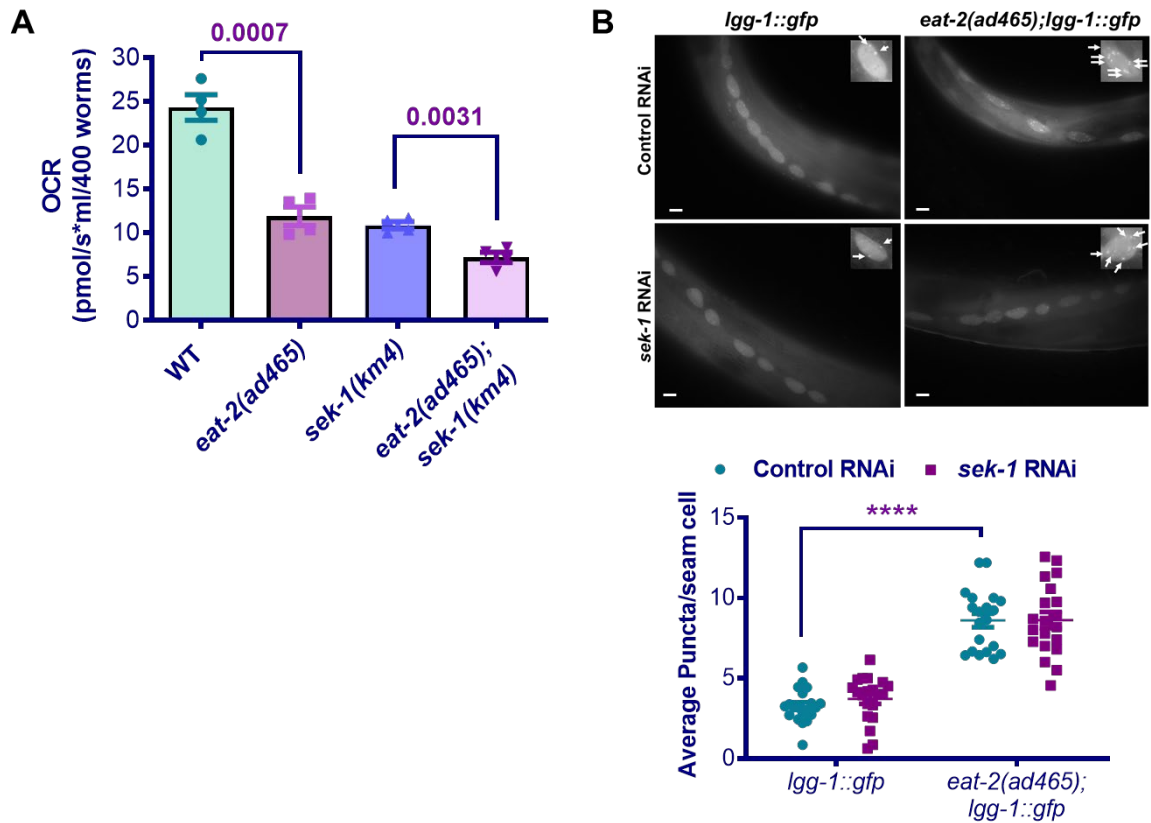

**Supplementary Figure 3. (A)** The oxygen consumption rate (OCR) is decreased in *eat-2(ad465)* as compared to WT. Similar decrease was observed on comparing *sek-1(km4)* and *eat-2(ad465);sek-1(km4)*.  $n=4$  independent experiments. Data are presented as mean values  $\pm$  SEM. Unpaired two-tailed *t*-test with Welch's correction. **(B)** Autophagy, as determined by puncta formation in the seam cells of a LGG-1::GFP-expressing strain (upper panel), was increased in *eat-2(ad465)* as compared to WT. Knocking down *sek-1* by RNAi has no effect. Quantification of one of two biologically independent experiments shown (lower panel).  $n=20$ . Data are presented as mean values  $\pm$  SEM. Two-way Anova-Sidak's multiple comparisons test, \*\*\*\* $P<0.0001$ . Scale bar = 10  $\mu$ m. Experiments performed at 20  $^{\circ}$ C. Source data are provided as a Source Data file.

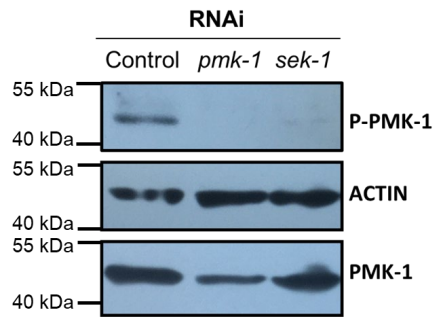

**Supplementary Figure 4.** Western blot analysis of WT grown on control, *pmk-1* and *sek-1* RNAi. The levels of phospho-PMK-1 is dramatically reduced in all cases. The level of PMK-1 is lower only in case of *pmk-1* RNAi and not in case of *sek-1* RNAi. One of two biologically independent experiments is shown. Experiments were performed at 20 °C. Source data are provided as a Source Data file.

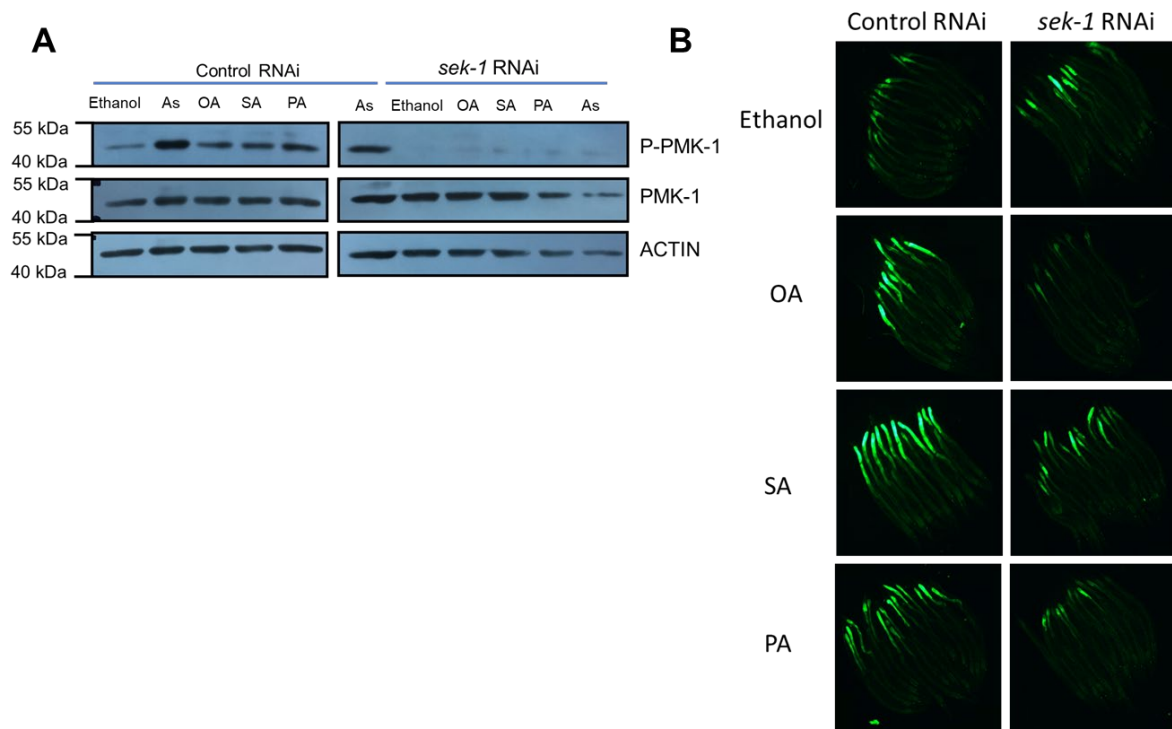

**Supplementary Figure 5. (A)** Western blot analysis of *Pcyp-35B1::gfp* grown on control or *sek-1* RNAi showing that OA, SA and PA supplementation upregulates phospho-PMK-1 levels, in a *sek-1*-dependent manner. Arsenite (As) treatment of worms was taken as a positive control. One of two biologically independent experiments is shown. **(B)** External supplementation of oleic acid (OA), stearic acid (SA) and palmitic acid (PA) induces expression of GFP (at 30-36 hours post YA) in the *Pcyp-35B1::gfp* worms that was suppressed when *sek-1* is knocked down using RNAi. Data from one of two biologically independent experiments shown. Multiple overlapping images were acquired at 100X magnification to cover the entire worm body and stitched together to generate a contiguous image. Experiments were performed at 20 °C. Source data are provided as a Source Data file.

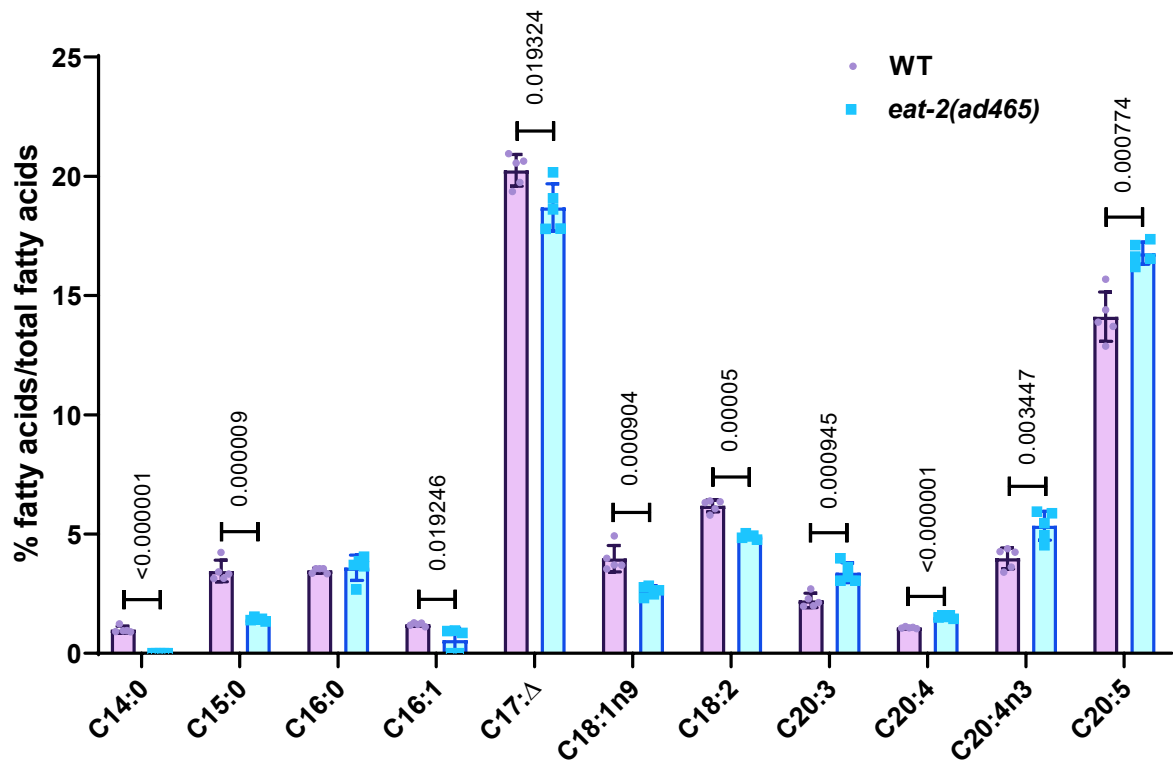

**Supplementary Figure 6.** GC-MS analysis revealed that PUFAs are differentially regulated in *eat-2(ad465)* as compared to WT. n=5 biologically independent samples. Data are presented as mean values  $\pm$  Std. Dev. Unpaired two-tailed *t*-test. Experiments were performed at 20 °C. Source data are provided as a Source Data file.

**Supplementary Table 1:** Summary of life span analysis, related to Figures 1, 2, 5 and 7, Supplementary Figure 1.

| Genetic Background             | RNAi used <sup>a</sup> | Mean ± SEM (Days) | n   | % change with respect to Control | P-value |  | Genetic Background  | RNAi used <sup>a</sup> | Mean ± SEM (Days) | n   | % change with respect to Control | P-value |
|--------------------------------|------------------------|-------------------|-----|----------------------------------|---------|--|---------------------|------------------------|-------------------|-----|----------------------------------|---------|
| Set1 (Figure 1A, B)            |                        |                   |     |                                  |         |  | Set2                |                        |                   |     |                                  |         |
| WT                             | Control                | 19.6 ± 0.42       | 68  |                                  |         |  | WT                  | Control                | 18.21 ± 0.33      | 85  |                                  |         |
| WT                             | <i>drl-1</i>           | 30.44 ± 0.33      | 104 | 55.31                            | <0.0001 |  | WT                  | <i>drl-1</i>           | 27.9 ± 0.64       | 50  | 53.21                            | <0.0001 |
| <i>pmk-1(km25)</i>             | Control                | 18.93 ± 0.63      | 42  |                                  |         |  | <i>pmk-1(km25)</i>  | Control                | 15.61 ± 0.26      | 99  |                                  |         |
| <i>pmk-1(km25)</i>             | <i>drl-1</i>           | 17.76 ± 0.53      | 86  | -6.18                            | 0.1793  |  | <i>pmk-1(km25)</i>  | <i>drl-1</i>           | 18.65 ± 0.53      | 79  | 19.47                            | <0.0001 |
| Set1 (Figure 1A, C)            |                        |                   |     |                                  |         |  | Set2                |                        |                   |     |                                  |         |
| WT                             | Control                | 19.6 ± 0.42       | 68  |                                  |         |  | WT                  | Control                | 16.56 ± 0.29      | 97  |                                  |         |
| WT                             | <i>drl-1</i>           | 30.44 ± 0.33      | 104 | 55.31                            | <0.0001 |  | WT                  | <i>drl-1</i>           | 30.38 ± 0.29      | 97  | 83.45                            | <0.0001 |
| <i>nsy-1(ok593)</i>            | Control                | 24.41 ± 0.36      | 128 |                                  |         |  | <i>nsy-1(ok593)</i> | Control                | 24.52 ± 0.57      | 86  |                                  |         |
| <i>nsy-1(ok593)</i>            | <i>drl-1</i>           | 26.27 ± 0.48      | 102 | 7.62                             | 0.0003  |  | <i>nsy-1(ok593)</i> | <i>drl-1</i>           | 26.4 ± 0.81       | 75  | 7.67                             | 0.0071  |
| Set1 (Figure 1D)               |                        |                   |     |                                  |         |  | Set2                |                        |                   |     |                                  |         |
| WT                             | Control                | 17.49 ± 0.3       | 88  |                                  |         |  | WT                  | Control                | 19.6 ± 0.42       | 68  |                                  |         |
| WT                             | <i>drl-1</i>           | 30.29 ± 0.5       | 73  | 73.18                            | <0.0001 |  | WT                  | <i>drl-1</i>           | 30.44 ± 0.33      | 104 | 55.31                            | <0.0001 |
| <i>sek-1(km4)</i>              | Control                | 18.25 ± 0.35      | 81  |                                  |         |  | <i>sek-1(km4)</i>   | Control                | 21.71 ± 0.47      | 63  |                                  |         |
| <i>sek-1(km4)</i>              | <i>drl-1</i>           | 18.81 ± 0.49      | 78  | 3.07                             | 0.2051  |  | <i>sek-1(km4)</i>   | <i>drl-1</i>           | 16.63 ± 0.51      | 81  | -23.40                           | <0.0001 |
| Set1 (Supplementary Figure 1C) |                        |                   |     |                                  |         |  |                     |                        |                   |     |                                  |         |
| WT                             | Control                | 19.02 ± 0.27      | 93  |                                  |         |  |                     |                        |                   |     |                                  |         |
| WT                             | <i>drl-1</i>           | 27.48 ± 0.33      | 86  | 44.47                            | <0.0001 |  |                     |                        |                   |     |                                  |         |
| <i>jnk-1(gk7)</i>              | Control                | 15.56 ± 0.32      | 93  |                                  |         |  |                     |                        |                   |     |                                  |         |
| <i>jnk-1(gk7)</i>              | <i>drl-1</i>           | 27.79 ± 0.64      | 82  | 78.59                            | <0.0001 |  |                     |                        |                   |     |                                  |         |





|                   |              |              |     |        |         |  |                   |              |              |     |             |         |
|-------------------|--------------|--------------|-----|--------|---------|--|-------------------|--------------|--------------|-----|-------------|---------|
| <i>sek-1(km4)</i> | OD 3.0       | 27.75 ± 1    | 48  |        |         |  | <i>sek-1(km4)</i> | OD 3.0       | 25.65 ± 0.64 | 40  |             |         |
| <i>sek-1(km4)</i> | OD 1.0       | 27.02 ± 1.03 | 45  | -2.63  | 0.6280  |  | <i>sek-1(km4)</i> | OD 1.0       | 25.67 ± 0.83 | 48  | 0.08        | 0.4368  |
| <i>sek-1(km4)</i> | OD 0.5       | 25.19 ± 1.05 | 47  | -9.23  | 0.1053  |  | <i>sek-1(km4)</i> | OD 0.5       | 25.25 ± 1.01 | 44  | -1.56       | 0.3645  |
| <i>sek-1(km4)</i> | OD 0.25      | 24.72 ± 1.06 | 43  | -10.92 | 0.0463  |  | <i>sek-1(km4)</i> | OD 0.25      | 25.41 ± 1.06 | 46  | -0.94       | 0.2710  |
| <i>sek-1(km4)</i> | OD 0.125     | 23.07 ± 0.95 | 41  | -16.86 | 0.0012  |  | <i>sek-1(km4)</i> | OD 0.125     | 24.09 ± 0.93 | 47  | -6.08       | 0.6502  |
| <i>sek-1(km4)</i> | OD 0.0156    | 24.13 ± 0.98 | 45  | -13.05 | 0.0121  |  | <i>sek-1(km4)</i> | OD 0.0156    | 25.84 ± 0.76 | 49  | 0.74        | 0.4126  |
|                   |              |              |     |        |         |  |                   |              |              |     |             |         |
| Set3              | OP50-L44440  |              |     |        |         |  | Set4              | OP50-L44440  |              |     |             |         |
| WT                | OD 3.0       | 21.69 ± 0.54 | 42  |        |         |  | WT                | OD 3.0       | 23.06 ± 0.72 | 47  |             |         |
| WT                | OD 1.0       | 28.79 ± 1.1  | 47  | 32.73  | <0.0001 |  | WT                | OD 1.0       | 30.64 ± 0.73 | 44  | 32.87       | <0.0001 |
| WT                | OD 0.5       | 34.77 ± 1.47 | 47  | 60.30  | <0.0001 |  | WT                | OD 0.5       | 34.13 ± 1.41 | 45  | 48.01       | <0.0001 |
| WT                | OD 0.25      | 33.89 ± 1.51 | 44  | 56.25  | <0.0001 |  | WT                | OD 0.25      | 27.36 ± 1.15 | 45  | 18.65       | 0.0002  |
| WT                | OD 0.125     | 30.25 ± 1.84 | 32  | 39.47  | <0.0001 |  | WT                | OD 0.125     | 27.17 ± 1.02 | 41  | 17.82       | 0.0007  |
| WT                | OD 0.0156    | 24.8 ± 1.18  | 45  | 14.34  | 0.0192  |  | WT                | OD 0.0156    | 22.19 ± 0.91 | 43  | -3.77       | 0.7390  |
|                   |              |              |     |        |         |  |                   |              |              |     |             |         |
| <i>sek-1(km4)</i> | OD 3.0       | 22.34 ± 0.85 | 35  |        |         |  | <i>sek-1(km4)</i> | OD 3.0       | 23.14 ± 1.22 | 37  |             |         |
| <i>sek-1(km4)</i> | OD 1.0       | 24.95 ± 0.9  | 37  | 11.68  | 0.0170  |  | <i>sek-1(km4)</i> | OD 1.0       | 20.23 ± 1.11 | 39  | -12.58      | 0.0752  |
| <i>sek-1(km4)</i> | OD 0.5       | 23.83 ± 1.09 | 47  | 6.67   | 0.0767  |  | <i>sek-1(km4)</i> | OD 0.5       | 20.1 ± 0.81  | 41  | -13.14      | 0.0098  |
| <i>sek-1(km4)</i> | OD 0.25      | 22.61 ± 0.99 | 44  | 1.21   | 0.5775  |  | <i>sek-1(km4)</i> | OD 0.25      | 20.4 ± 1.13  | 30  | -11.84      | 0.0424  |
| <i>sek-1(km4)</i> | OD 0.125     | 24.2 ± 0.9   | 46  | 8.33   | 0.0807  |  | <i>sek-1(km4)</i> | OD 0.125     | 18.78 ± 0.95 | 45  | -18.84      | 0.0046  |
| <i>sek-1(km4)</i> | OD 0.0156    | 24.72 ± 1.03 | 43  | 10.65  | 0.0365  |  | <i>sek-1(km4)</i> | OD 0.0156    | 20.05 ± 1.19 | 38  | -13.35      | 0.0704  |
|                   |              |              |     |        |         |  |                   |              |              |     |             |         |
|                   |              |              |     |        |         |  |                   |              |              |     |             |         |
| Set1 (Figure 2D)  | HT115-L44440 |              |     |        |         |  | Set2              | HT115-L44440 |              |     |             |         |
| WT                | control      | 18.99 ± 0.25 | 202 |        |         |  | WT                | control      | 18.01 ± 0.19 | 175 |             |         |
| WT                | 2-DOG        | 23.37 ± 0.44 | 79  | 23.06  | <0.0001 |  | WT                | 2-DOG        | 22.4 ± 0.38  | 151 | 24.37534703 | <0.0001 |
| <i>sek-1(km4)</i> | control      | 22.36 ± 0.51 | 113 |        |         |  | <i>sek-1(km4)</i> | control      | 22.22 ± 0.5  | 113 |             |         |

|                                    |                              |              |     |        |         |  |                                   |                              |              |     |             |         |
|------------------------------------|------------------------------|--------------|-----|--------|---------|--|-----------------------------------|------------------------------|--------------|-----|-------------|---------|
| <i>sek-1(km4)</i>                  | <b>2-DOG</b>                 | 26.97 ± 0.43 | 116 | 20.62  | <0.0001 |  | <i>sek-1(km4)</i>                 | <b>2-DOG</b>                 | 25.9 ± 0.49  | 124 | 16.56165617 | <0.0001 |
| Set1 (Figure 5B)                   | <b>RNAi used<sup>a</sup></b> |              |     |        |         |  | Set2                              | <b>RNAi used<sup>a</sup></b> |              |     |             |         |
| <b>WT</b>                          | <b>Control</b>               | 12.92 ± 0.16 | 102 |        |         |  | <b>WT</b>                         | <b>Control</b>               | 15.65 ± 0.13 | 231 |             |         |
|                                    | <i>drl-1</i>                 | 15.07 ± 0.17 | 213 | 16.64  | <0.0001 |  |                                   | <i>drl-1</i>                 | 18.11 ± 0.1  | 417 | 15.72       | <0.0001 |
| <i>fat-6(tm331); fat-7(wa36)</i>   | <b>Control</b>               | 11.82 ± 0.15 | 130 |        |         |  | <i>fat-6(tm331); fat-7(wa36)</i>  | <b>Control</b>               | 14.35 ± 0.09 | 244 |             |         |
|                                    | <i>drl-1</i>                 | 11.67 ± 0.16 | 196 | -1.27  | 0.7346  |  |                                   | <i>drl-1</i>                 | 15.42 ± 0.14 | 237 | 7.46        | <0.0001 |
| Set1 (Figure 5C)                   |                              |              |     |        |         |  | Set2                              |                              |              |     |             |         |
| <b>WT</b>                          | <b>Control</b>               | 12.89 ± 0.07 | 428 |        |         |  | <b>WT</b>                         | <b>Control</b>               | 14.54 ± 0.15 | 242 |             |         |
|                                    | <i>drl-1</i>                 | 14.99 ± 0.17 | 193 | 16.29  | <0.0001 |  |                                   | <i>drl-1</i>                 | 17.11 ± 0.18 | 292 | 17.67537827 | <0.0001 |
| <i>fat-2(wa17)</i>                 | <b>Control</b>               | 13.39 ± 0.27 | 51  |        |         |  | <i>fat-2(wa17)</i>                | <b>Control</b>               | 15.49 ± 0.41 | 59  |             |         |
|                                    | <i>drl-1</i>                 | 12.38 ± 0.24 | 63  | -7.54  | 0.0066  |  |                                   | <i>drl-1</i>                 | 15.5 ± 0.29  | 92  | 0.064557779 | 0.9096  |
| Set1 (Figure 5D)                   |                              |              |     |        |         |  | Set2                              |                              |              |     |             |         |
| <b>WT</b>                          | <b>Control</b>               | 13.70 ± 0.21 | 80  |        |         |  | <b>WT</b>                         | <b>Control</b>               | 14.40 ± 0.22 | 65  |             |         |
| <i>fat-2(tm789)</i>                | <b>Control</b>               | 14.79 ± 0.14 | 190 | 7.96   | <0.0001 |  | <i>fat-2(tm789)</i>               | <b>Control</b>               | 14.36 ± 0.21 | 125 | -0.28       | 0.6358  |
| <i>eat-2(ad465)</i>                | <b>Control</b>               | 17.33 ± 0.12 | 201 | 26.50  | <0.0001 |  | <i>eat-2(ad465)</i>               | <b>Control</b>               | 19.11 ± 0.16 | 74  | 32.71       | <0.0001 |
| <i>eat-2(ad465); fat-2(tm789)</i>  | <b>Control</b>               | 15.48 ± 0.17 | 120 | -10.68 | <0.0001 |  | <i>eat-2(ad465); fat-2(tm789)</i> | <b>Control</b>               | 15.34 ± 0.28 | 56  | -19.73      | <0.0001 |
| Set1 (Figure 5E -Mean of two sets) | <b>HT115-L44440</b>          |              |     |        |         |  | Set2                              | <b>HT115-L44440</b>          |              |     |             |         |
| <b>WT</b>                          | <b>OD 3.0</b>                | 14.14 ± 0.22 | 42  |        |         |  | <b>WT</b>                         | <b>OD 3.0</b>                | 14.11 ± 0.32 | 38  |             |         |
| <b>WT</b>                          | <b>OD 1.0</b>                | 18.27 ± 0.29 | 41  | 29.21  | <0.0001 |  | <b>WT</b>                         | <b>OD 1.0</b>                | 16.21 ± 0.52 | 43  | 14.88       | 0.0005  |
| <b>WT</b>                          | <b>OD 0.5</b>                | 18.56 ± 0.38 | 41  | 31.26  | <0.0001 |  | <b>WT</b>                         | <b>OD 0.5</b>                | 18.67 ± 0.48 | 45  | 32.32       | <0.0001 |
| <b>WT</b>                          | <b>OD 0.25</b>               | 19.86 ± 0.37 | 42  | 40.45  | <0.0001 |  | <b>WT</b>                         | <b>OD 0.25</b>               | 18.80 ± 0.41 | 46  | 33.24       | <0.0001 |
| <b>WT</b>                          | <b>OD 0.125</b>              | 18.45 ± 0.42 | 38  | 30.48  | <0.0001 |  | <b>WT</b>                         | <b>OD 0.125</b>              | 17.17 ± 0.47 | 42  | 21.69       | <0.0001 |

|                              |                        |              |     |       |         |  |                              |                        |              |     |        |         |
|------------------------------|------------------------|--------------|-----|-------|---------|--|------------------------------|------------------------|--------------|-----|--------|---------|
| WT                           | OD 0.0156              | 17.20 ± 0.42 | 40  | 21.64 | <0.0001 |  | WT                           | OD 0.0156              | 13.57 ± 0.49 | 42  | -3.83  | 0.3848  |
| <i>fat-2(wa17)</i>           | OD 3.0                 | 14.67 ± 0.36 | 45  |       |         |  | <i>fat-2(wa17)</i>           | OD 3.0                 | 15.37 ± 0.44 | 46  |        |         |
| <i>fat-2(wa17)</i>           | OD 1.0                 | 16.87 ± 0.41 | 46  | 15.00 | 0.0001  |  | <i>fat-2(wa17)</i>           | OD 1.0                 | 15.98 ± 0.47 | 42  | 3.97   | 0.3056  |
| <i>fat-2(wa17)</i>           | OD 0.5                 | 15.86 ± 0.43 | 42  | 8.11  | 0.0335  |  | <i>fat-2(wa17)</i>           | OD 0.5                 | 16.23 ± 0.55 | 48  | 5.60   | 0.0731  |
| <i>fat-2(wa17)</i>           | OD 0.25                | 17.21 ± 0.32 | 42  | 17.31 | <0.0001 |  | <i>fat-2(wa17)</i>           | OD 0.25                | 15.17 ± 0.57 | 47  | -1.30  | 0.6709  |
| <i>fat-2(wa17)</i>           | OD 0.125               | 16.15 ± 0.45 | 41  | 10.09 | 0.0061  |  | <i>fat-2(wa17)</i>           | OD 0.125               | 15.71 ± 0.56 | 42  | 2.21   | 0.2922  |
| <i>fat-2(wa17)</i>           | OD 0.0156              | 15.32 ± 0.60 | 38  | 4.43  | 0.117   |  | <i>fat-2(wa17)</i>           | OD 0.0156              | 14.98 ± 0.44 | 47  | -2.54  | 0.4834  |
| Set1 (Figure 7A, B)          | RNAi used <sup>a</sup> |              |     |       |         |  | Set2                         | RNAi used <sup>a</sup> |              |     |        |         |
| WT + Ethanol                 | Control                | 11.30 ± 0.07 | 270 |       |         |  | WT + Ethanol                 | Control                | 12.27 ± 0.09 | 212 |        |         |
|                              | <i>drl-1</i>           | 15.14 ± 0.10 | 401 | 33.98 | <0.0001 |  |                              | <i>drl-1</i>           | 13.81 ± 0.12 | 138 | 12.55  | <0.0001 |
| <i>fat-2(wa17)</i> + Ethanol | Control                | 07.62 ± 0.17 | 126 |       |         |  | <i>fat-2(wa17)</i> + Ethanol | Control                | 08.75 ± 0.25 | 59  |        |         |
|                              | <i>drl-1</i>           | 08.01 ± 0.13 | 201 | 5.12  | 0.1184  |  |                              | <i>drl-1</i>           | 07.29 ± 0.16 | 92  | -16.69 | <0.0001 |
| WT + EPA                     | Control                | 08.92 ± 0.13 | 128 |       |         |  | WT + EPA                     | Control                | 11.30 ± 0.09 | 257 |        |         |
|                              | <i>drl-1</i>           | 12.74 ± 0.08 | 313 | 42.83 | <0.0001 |  |                              | <i>drl-1</i>           | 14.14 ± 0.10 | 228 | 25.13  | <0.0001 |
| <i>fat-2(wa17)</i> + EPA     | Control                | 09.22 ± 0.26 | 114 |       |         |  | <i>fat-2(wa17)</i> + EPA     | Control                | 09.70 ± 0.27 | 46  |        |         |
|                              | <i>drl-1</i>           | 12.81 ± 0.23 | 113 | 38.94 | <0.0001 |  |                              | <i>drl-1</i>           | 13.36 ± 0.26 | 74  | 37.73  | <0.0001 |
| WT + LA                      | Control                | 11.93 ± 0.09 | 161 |       |         |  | WT + LA                      | Control                | 12.19 ± 0.11 | 178 |        |         |
|                              | <i>drl-1</i>           | 13.61 ± 0.10 | 310 | 14.08 | <0.0001 |  |                              | <i>drl-1</i>           | 14.16 ± 0.11 | 192 | 16.16  | <0.0001 |
| <i>fat-2(wa17)</i> + LA      | Control                | 10.81 ± 0.19 | 145 |       |         |  | <i>fat-2(wa17)</i> + LA      | Control                | 11.27 ± 0.20 | 71  |        |         |
|                              | <i>drl-1</i>           | 14.92 ± 0.25 | 114 | 38.02 | <0.0001 |  |                              | <i>drl-1</i>           | 14.33 ± 0.39 | 49  | 27.15  | <0.0001 |

<sup>a</sup> All RNAi were taken from the Ahringer RNAi library, unless otherwise mentioned

Survival graphs were plotted using GraphPad Prism 8 (GraphPad Software, Inc., La Jolla, CA). All the statistical analysis to measure *P*-values between survival curves was performed using Log-rank (Mantel-Cox) test through online software OASIS 1.0 (<http://sbi.postech.ac.kr/oasis>). Data is represented as mean lifespan ± SEM. number of animals = n. Conditions for all the lifespans experiments are provided in Figure Legends.

**Supplementary Table 2, related to Figure 4, 5: List of primers used in the study.**

| Gene name (Target)                                                             | Primer Name           | Sequence                   |
|--------------------------------------------------------------------------------|-----------------------|----------------------------|
| <b>qRT-Primers</b>                                                             |                       |                            |
| <b>Cytoprotective (CyTP) xenobiotic detoxification genes</b>                   |                       |                            |
| <i>cyp-33C8</i>                                                                | Forward Primer        | CGCTGGATGATGTGCTCAACTACTGG |
|                                                                                | Reverse Primer        | GCTTCTTCTGCTCTTTCAGGTAGG   |
| <i>cyp-34A4</i>                                                                | Forward Primer        | GATTTGAACAGGGTGACCCAGAAT   |
|                                                                                | Reverse Primer        | TCGATGACATGCTCACCCT        |
| <i>cyp-32B1</i>                                                                | Forward Primer        | GGTGTGTTGAAGTTATGGTTGGGACC |
|                                                                                | Reverse Primer        | TGTCGCCGGTGCTGATTA AAAAGAC |
| <i>ugt-16</i>                                                                  | Forward Primer        | CTTGCTGACGATCGACTAACC      |
|                                                                                | Reverse Primer        | CGGTCTGTATGGCTTCTCTAAG     |
| <i>nhr-31</i>                                                                  | Forward Primer        | GAGTTGTGAAAGTTGAAAGAGTTCC  |
|                                                                                | Reverse Primer        | CTCCATTCTGTGATCCACCCT      |
| <i>nhr-57</i>                                                                  | Forward Primer        | CCGGAAGTTGTTCAAGCAATCC     |
|                                                                                | Reverse Primer        | GTCATAGTCACCGAGTTCCAGA     |
| <i>nhr-206</i>                                                                 | Forward Primer        | ATCCAGCTGTCTCCGATTTTCC     |
|                                                                                | Reverse Primer        | GATCAGCACCGTGAATCTGT       |
| <i>ftn-1</i>                                                                   | Forward Primer        | GAGTGGGGAAGTGTCTTGA        |
|                                                                                | Reverse Primer        | GATCGAATGTACCTGCTCTTCC     |
| <i>pgp-9</i>                                                                   | Forward Primer        | TACAGGCTTCATGCTTCATGG      |
|                                                                                | Reverse Primer        | ACTGAGCCATCATCTGG          |
| <i>cyp-35B1</i>                                                                | Forward Primer        | CTTCATGTCAGTAATAATCTTGG    |
|                                                                                | Reverse Primer        | CAATTCGGCACATCTCGTG        |
| <i>ugt-50</i>                                                                  | Forward Primer        | GATATGTGTGCAGATCTACTTGG    |
|                                                                                | Reverse Primer        | GTTGAACAACCTCACTATAG       |
| <i>gst-6</i>                                                                   | Forward Primer        | CAAAAATAACACTCCATTC        |
|                                                                                | Reverse Primer        | GCCGCCTCGGTGTCATTTTGTG     |
| <i>gst-19</i>                                                                  | Forward Primer        | GAAGTCAAAGTCCCAATG         |
|                                                                                | Reverse Primer        | CAGCAAATCCGAATTTTCAGAG     |
| <i>act-1</i>                                                                   | Forward Primer        | CTCTTGCCCCATCAACCATG       |
|                                                                                | Reverse Primer        | CTTGCTTGGAGATCCACATC       |
|                                                                                |                       |                            |
| <b>Primers used to confirm the p38-MAPK deletion strains used in the study</b> |                       |                            |
| <i>sek-1(km4)</i>                                                              | WT Forward Primer     | GGATTTCAAACGCAGGTCACTCGT   |
|                                                                                | WT Reverse Primer     | CCGCGTCACAGACTGTTCT        |
|                                                                                | Mutant Reverse Primer | CGGTTGACTCGGAAAGAAAC       |
| <i>pmk-1(km25)</i>                                                             | WT Forward Primer     | CCATGACCTCAGAGCCTCTTT      |
|                                                                                | WT Reverse Primer     | CTCGTGGAGTCGGATGAAGT       |
|                                                                                | Mutant Reverse Primer | TCAACAGTCTGCGTGTAATGC      |
| <i>nsy-1(ok593)</i>                                                            | WT Forward Primer     | TCTGGAAAACAGCCAACA         |
|                                                                                | WT Reverse Primer     | CTCGTGCAGCGTACACAGTT       |
|                                                                                | Mutant Reverse Primer | CAATCCACGTAGCCAACCTGA      |
